# Supplementary material
Source: PubMed Central journal article supplement (PMC5860476)
Supplement: kwx127liwebmaterialfinal.pdf [file kwx127liwebmaterialfinal.pdf]

**Web Material:****Residential Proximity to Major Roadways, Fine Particulate Matter, and Hepatic Steatosis:****The Framingham Heart Study**

Wenyuan Li <sup>1,2</sup>, Kirsten S. Dorans <sup>1,2</sup>, Elissa H. Wilker <sup>1,2</sup>, Mary B. Rice <sup>2,3</sup>, Michelle T. Long <sup>4,5</sup>, Joel Schwartz <sup>1,6</sup>, Brent A. Coull <sup>7</sup>, Petros Koutrakis <sup>6</sup>, Diane R. Gold <sup>6,8</sup>, Caroline S. Fox <sup>5,9</sup>, Murray A. Mittleman <sup>1,2</sup>

1 Department of Epidemiology, Harvard T.H. Chan School of Public Health, Boston, Massachusetts;

2 Cardiovascular Epidemiology Research Unit, Division of Cardiology, Beth Israel Deaconess Medical Center, Harvard Medical School, Boston, Massachusetts;

3 Division of Pulmonary, Critical Care and Sleep Medicine, Beth Israel Deaconess Medical Center, Boston, Massachusetts;

4 Division of Gastroenterology, Boston Medical Center, Boston University School of Medicine, Boston, Massachusetts;

5 National Heart, Lung, and Blood Institute's Framingham Heart Study, Framingham, Massachusetts;

6 Department of Environmental Health, Harvard T.H. Chan School of Public Health, Boston, Massachusetts;

7 Department of Biostatistics, Harvard T.H. Chan School of Public Health, Boston, Massachusetts;

8 Channing Division of Network Medicine, Brigham and Women's Hospital and Harvard Medical School, Boston, Massachusetts;

9 Division of Intramural Research, National Heart, Lung, and Blood Institute, Bethesda, Maryland.

**Web Table 1.** The associations of 2003 annual PM<sub>2.5</sub><sup>a</sup> with liver-to-phantom ratio (LPR) and presence of hepatic steatosis stratified by median age at the time of multi-detector computed tomography (MDCT) scan, sex, and education levels in the Framingham MDCT Study (2002-2005), Boston, Massachusetts.

|                                | Liver-to-phantom ratio |               |          | Hepatic steatosis <sup>b</sup> |            |          |
|--------------------------------|------------------------|---------------|----------|--------------------------------|------------|----------|
|                                | $\beta$                | 95% CI        | <i>P</i> | PR                             | 95% CI     | <i>P</i> |
| Median age <sup>c</sup>        |                        |               |          |                                |            |          |
| $\leq 50$ yr                   | 0.001                  | -0.001, 0.004 | 0.25     | 0.93                           | 0.83, 1.05 | 0.33     |
| $> 50$ yr                      | -0.001                 | -0.004, 0.002 |          | 1.01                           | 0.91, 1.13 |          |
| Sex <sup>d</sup>               |                        |               |          |                                |            |          |
| Women                          | -0.001                 | -0.004, 0.002 | 0.15     | 1.05                           | 0.95, 1.17 | 0.06     |
| Men                            | 0.002                  | -0.001, 0.005 |          | 0.91                           | 0.82, 1.02 |          |
| Educational level <sup>e</sup> |                        |               |          |                                |            |          |
| $\leq$ High school             | 0.002                  | -0.003, 0.006 | 0.59     | 1.00                           | 0.83, 1.21 | 0.74     |
| $\geq$ College                 | 0.000                  | -0.002, 0.002 |          | 0.97                           | 0.88, 1.06 |          |

Abbreviation: MDCT, multi-detector computed tomography; CI, confidence intervals; PR, prevalence ratio.

<sup>a</sup> Results from PM<sub>2.5</sub> analyses were scaled to be as equivalent to per 1.4  $\mu\text{g}/\text{m}^3$  increase in 2003 annual PM<sub>2.5</sub> concentrations.

<sup>b</sup> Defined as liver-to-phantom ratio  $\leq 0.33$ .

<sup>c</sup> Models were additionally adjusted for age at MDCT scan, and (age at MDCT scan)<sup>2</sup>; sex; smoking status (current, former, or never); pack years; alcohol intake; educational level; usual occupation; physical activity; anti-hypertensive medication use; statin use; quartile of median household income in the participant's census tract in 2000; median value of owner occupied housing units in the census tract; population density (population/km<sup>2</sup>) in the census tract; cardiovascular disease; diabetes; and an exam identifier.

<sup>d</sup> Models were additionally adjusted for age at MDCT scan, and (age at MDCT scan)<sup>2</sup>; smoking status (current, former, or never); pack years; alcohol intake; educational level; usual occupation; physical activity; anti-hypertensive medication use; statin use; quartile of median household income in the participant's census tract in 2000; median value of owner occupied housing units in the census tract; population density (population/km<sup>2</sup>) in the census tract; cardiovascular disease; diabetes; and an exam identifier.

<sup>e</sup> Models were additionally adjusted for age at MDCT scan, and (age at MDCT scan)<sup>2</sup>; sex; smoking status (current, former, or never); pack years; alcohol intake; usual occupation; physical activity; anti-hypertensive medication use; statin use; quartile of median household income in the participant's census tract in 2000; median value of owner occupied housing units in the census tract; population density (population/km<sup>2</sup>) in the census tract; cardiovascular disease; diabetes; and an exam identifier.

**Web Table 2.** The associations of distance to the nearest major roadway <sup>a</sup> with liver-to-phantom ratio (LPR) and presence of hepatic steatosis stratified by median age at the time of multi-detector computed tomography (MDCT) scan, sex, and education levels in the Framingham mdct Study (2002-2005), Boston, Massachusetts.

|                                | Liver-to-phantom ratio |                |          | Hepatic steatosis <sup>b</sup> |            |          |
|--------------------------------|------------------------|----------------|----------|--------------------------------|------------|----------|
|                                | $\beta$                | 95% CI         | <i>P</i> | PR                             | 95% CI     | <i>P</i> |
| Median age <sup>c</sup>        |                        |                |          |                                |            |          |
| $\leq 50$ yr                   | -0.002                 | -0.005, 0.002  | 0.25     | 1.09                           | 0.92, 1.29 | 0.33     |
| $> 50$ yr                      | -0.005                 | -0.008, -0.001 |          | 1.21                           | 1.07, 1.37 |          |
| Sex <sup>d</sup>               |                        |                |          |                                |            |          |
| Women                          | -0.005                 | -0.008, -0.001 | 0.29     | 1.37                           | 1.20, 1.56 | 0.001    |
| Men                            | -0.002                 | -0.006, 0.002  |          | 0.98                           | 0.84, 1.14 |          |
| Educational level <sup>e</sup> |                        |                |          |                                |            |          |
| $\leq$ High school             | -0.005                 | -0.010, 0.000  | 0.39     | 1.29                           | 1.11, 1.51 | 0.15     |
| $\geq$ College                 | -0.003                 | -0.006, 0.000  |          | 1.11                           | 0.98, 1.26 |          |

Abbreviation: MDCT, multi-detector computed tomography; CI, confidence intervals; PR, prevalence ratio.

<sup>a</sup> Results were scaled to approximate comparing participants who lived 58 m (25<sup>th</sup> percentile) from the nearest major roadway to those who lived 416 m (75<sup>th</sup> percentile) from the nearest major roadway.

<sup>b</sup> Defined as liver-to-phantom ratio  $\leq 0.33$ .

<sup>c</sup> Models were additionally adjusted for age at MDCT scan, and (age at MDCT scan)<sup>2</sup>; sex; smoking status (current, former, or never); pack years; alcohol intake; educational level; usual occupation; physical activity; anti-hypertensive medication use; statin use; quartile of median household income in the participant's census tract in 2000; median value of owner occupied housing units in the census tract; population density (population/km<sup>2</sup>) in the census tract; cardiovascular disease; diabetes; and an exam identifier.

<sup>d</sup> Models were additionally adjusted for age at MDCT scan, and (age at MDCT scan)<sup>2</sup>; smoking status (current, former, or never); pack years; alcohol intake; educational level; usual occupation; physical activity; anti-hypertensive medication use; statin use; quartile of median household income in the participant's census tract in 2000; median value of owner occupied housing units in the census tract; population density (population/km<sup>2</sup>) in the census tract; cardiovascular disease; diabetes; and an exam identifier.

<sup>e</sup> Models were additionally adjusted for age at MDCT scan, and (age at MDCT scan)<sup>2</sup>; sex; smoking status (current, former, or never); pack years; alcohol intake; usual occupation; physical activity; anti-hypertensive medication use; statin use; quartile of median household income in the participant's census tract in 2000; median value of owner occupied housing units in the census tract; population density (population/km<sup>2</sup>) in the census tract; cardiovascular disease; diabetes; and an exam identifier.

**Web Table 3.** Summary of Results from Sensitivity Analyses Conducted for the Associations of Distance to Major Roadways and 2003 Annual Average PM<sub>2.5</sub> with Liver-to-Phantom Ratio (LPR) and Presence of Hepatic Steatosis in the Framingham Multi-Detector Computed Tomography (MDCT) Study (2002-2005), Boston, Massachusetts.

| <b>Liver-to-Phantom Ratio</b>                                | Living closer to major roadways <sup>a</sup> |                | PM <sub>2.5</sub> <sup>a</sup> |               |
|--------------------------------------------------------------|----------------------------------------------|----------------|--------------------------------|---------------|
|                                                              | $\beta$                                      | 95% CI         | $\beta$                        | 95% CI        |
| Primary results                                              | -0.003                                       | -0.006, -0.001 | 0.000                          | -0.002, 0.002 |
| Adjust for BMI <sup>b</sup>                                  | -0.003                                       | -0.006, 0.000  | 0.000                          | -0.002, 0.002 |
| Further exclusion alcohol intake <sup>c</sup>                | -0.003                                       | -0.006, 0.000  | 0.000                          | -0.002, 0.003 |
| Adjust for time covariates <sup>d</sup>                      | -0.003                                       | -0.006, -0.001 | 0.000                          | -0.002, 0.002 |
| Exclude those who changed addresses <sup>e</sup>             | -0.003                                       | -0.006, -0.001 | 0.000                          | -0.002, 0.003 |
| Exclude participants with CVD or diabetes <sup>f</sup>       | -0.003                                       | -0.006, -0.001 | 0.001                          | -0.002, 0.003 |
| Same sample size for PM <sub>2.5</sub> and distance analyses | -0.003                                       | -0.006, -0.001 | 0.000                          | -0.002, 0.003 |
| 2003-2005 annual average PM <sub>2.5</sub>                   | --                                           | --             | 0.000                          | -0.002, 0.002 |
| <b>Hepatic Steatosis<sup>g</sup></b>                         | PR                                           | 95% CI         | PR                             | 95% CI        |
| Primary results                                              | 1.16                                         | 1.05, 1.28     | 0.97                           | 0.89, 1.06    |
| Adjust for BMI <sup>b</sup>                                  | 1.17                                         | 1.05, 1.29     | 0.98                           | 0.90, 1.07    |
| Further exclusion alcohol intake <sup>c</sup>                | 1.16                                         | 1.04, 1.30     | 0.98                           | 0.89, 1.07    |
| Adjust for time covariates <sup>d</sup>                      | 1.16                                         | 1.05, 1.29     | 0.98                           | 0.90, 1.06    |
| Exclude those who changed addresses <sup>e</sup>             | 1.17                                         | 1.05, 1.29     | 0.97                           | 0.89, 1.06    |
| Exclude participants with CVD or diabetes <sup>f</sup>       | 1.15                                         | 1.03, 1.29     | 0.98                           | 0.89, 1.07    |
| Same sample size for PM <sub>2.5</sub> and distance analyses | 1.16                                         | 1.05, 1.28     | 0.97                           | 0.88, 1.07    |
| 2003-2005 annual average PM <sub>2.5</sub>                   | --                                           | --             | 0.97                           | 0.90, 1.05    |

Abbreviation: MDCT, multi-detector computed tomography; BMI, body mass index; CI, confidence interval; PM<sub>2.5</sub>, fine particulate matter; PR, prevalence ratio.

a Models were adjusted for age at MDCT scan, and (age at MDCT scan)<sup>2</sup>, sex; an exam identifier; smoking status; pack years; alcohol intake; educational level; usual occupation; physical activity; anti-hypertensive medication use; statin use; quartile of median household income in the participant's census tract in 2000; median value of owner occupied housing units in the census tract; population density in the census tract, cardiovascular disease and diabetes. Results from distance analyses were scaled to approximate contrasting participants who lived 58 m (25<sup>th</sup> percentile) from the nearest major roadway to those who lived 416 m (75<sup>th</sup> percentile) from the nearest major roadway. And results from PM<sub>2.5</sub> analyses were scaled to be equivalent to per 1.4  $\mu\text{g}/\text{m}^3$  increase in 2003 annual PM<sub>2.5</sub> concentrations.

b Additionally adjusted for BMI

c Further excluded men who reported > 14 drinks/week and women who reported > 7 drinks/week.

d Additionally adjusted for date of MDCT scan, days between physical examination date and MDCT examination date, and the year of MDCT scan.

e Excluded participants who changed their addresses between Offspring examination 6 and 7.

f Excluded participants who had cardiovascular disease or diabetes.

g Hepatic steatosis defined as having liver-to-phantom ratio  $\leq 0.33$ .

**Web Table 4.** Comparison of the Associations of Distance to Major Roadways and 2003 Annual Average PM<sub>2.5</sub> with Liver-to-Phantom Ratio (LPR) and Presence of Hepatic Steatosis before and after including Participants Who Lived > 1000 m from Major Roadways in the Framingham Multi-Detector Computed Tomography (MDCT) Study (2002-2005), Boston, Massachusetts.

| <b>Liver-to-Phantom Ratio</b>          | Primary analyses <sup>a</sup> |                | Include participants who lived $\geq$ 1000 m <sup>a</sup> |                |
|----------------------------------------|-------------------------------|----------------|-----------------------------------------------------------|----------------|
|                                        | $\beta$                       | 95% CI         | $\beta$                                                   | 95% CI         |
| Log <sub>e</sub> Distance <sup>b</sup> | -0.003                        | -0.006, -0.001 | -0.002                                                    | -0.005, 0.000  |
| Distance Categories, m                 |                               |                |                                                           |                |
| <50                                    | -0.004                        | -0.010, 0.002  | -0.002                                                    | -0.008, 0.003  |
| 50-99.9                                | -0.010                        | -0.018, -0.003 | -0.009                                                    | -0.017, -0.002 |
| 100-199.9                              | -0.002                        | -0.008, 0.004  | -0.001                                                    | -0.007, 0.005  |
| 200-399.9                              | 0.000                         | -0.006, 0.005  | 0.001                                                     | -0.004, 0.006  |
| Reference                              | 0                             |                | 0                                                         |                |
| <b>Hepatic Steatosis</b> <sup>c</sup>  | PR                            | 95% CI         | PR                                                        | 95% CI         |
| Log <sub>e</sub> Distance <sup>b</sup> | 1.16                          | 1.05, 1.28     | 1.12                                                      | 1.02, 1.23     |
| Distance Categories, m                 |                               |                |                                                           |                |
| <50                                    | 1.21                          | 0.94, 1.55     | 1.16                                                      | 0.92, 1.45     |
| 50-99.9                                | 1.44                          | 1.05, 1.98     | 1.39                                                      | 1.03, 1.87     |
| 100-199.9                              | 1.09                          | 0.81, 1.46     | 1.04                                                      | 0.79, 1.36     |
| 200-399.9                              | 0.95                          | 0.72, 1.25     | 0.91                                                      | 0.71, 1.17     |
| Reference group                        | 0                             |                | 0                                                         |                |

Abbreviation: MDCT, multi-detector computed tomography; PR, prevalence ratio; CI, confidence interval.

<sup>a</sup> Models were adjusted for age at MDCT scan, and (age at MDCT scan)<sup>2</sup>, sex; an exam identifier; smoking status; pack years; alcohol intake; educational level; usual occupation; physical activity; anti-hypertensive medication use; statin use; quartile of median household income in the participant's census tract in 2000; median value of owner occupied housing units in the census tract; population density in the census tract, cardiovascular disease and diabetes.

<sup>b</sup> Results from distance analyses were scaled to approximate contrasting participants who lived 58 m (25<sup>th</sup> percentile) from the nearest major roadway to those who lived 416 m (75<sup>th</sup> percentile) from the nearest major roadway.

<sup>c</sup> Hepatic steatosis defined as having liver-to-phantom ratio  $\leq$  0.33.
